# Supplementary material for: Consolidation of Calcium Carbonate Using Polyacrylamides with Different Chemistries
Source: MDPI journal article supplement (doi:10.3390/powders3010001), 2023-12-21
Supplement: s1 [file s1]

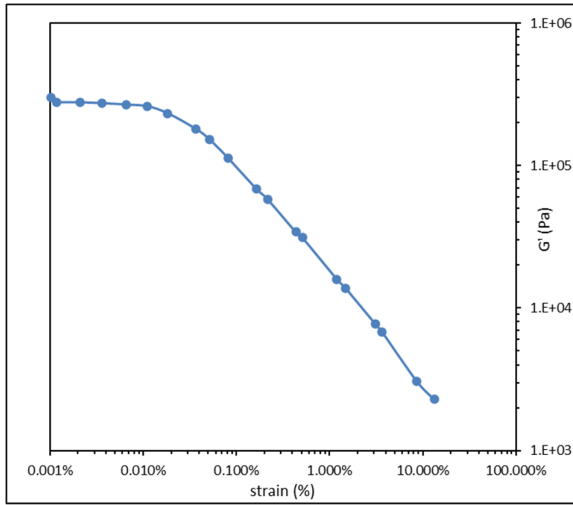

Figure S 1 Example of result from amplitude sweep rheology

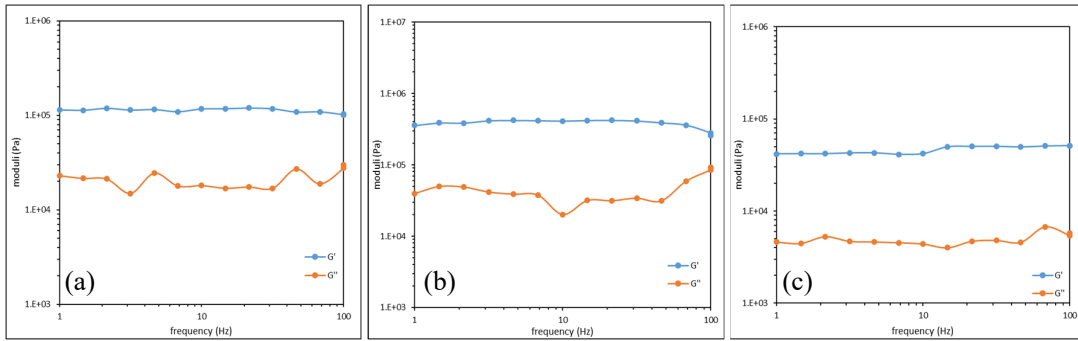

Figure S 2 Oscillatory frequency sweep result of F3330 at (a)  $1\text{mgpol/gCaCO}_3$ ; (b)  $3\text{mgpol/gCaCO}_3$ ; (c)  $10\text{mgpol/gCaCO}_3$
